# Supplementary material for: Sequential regression and simulation: a method for estimating causal effects from heterogeneous clinical trials without a common control group
Source: Springer Nature journal article supplement (doi:10.1186/s12874-023-02020-5), 2023-10-03
Supplement: MOESM2 [file 26120288]

Supplementary Figure 1: PRISMA-IPD flow diagram

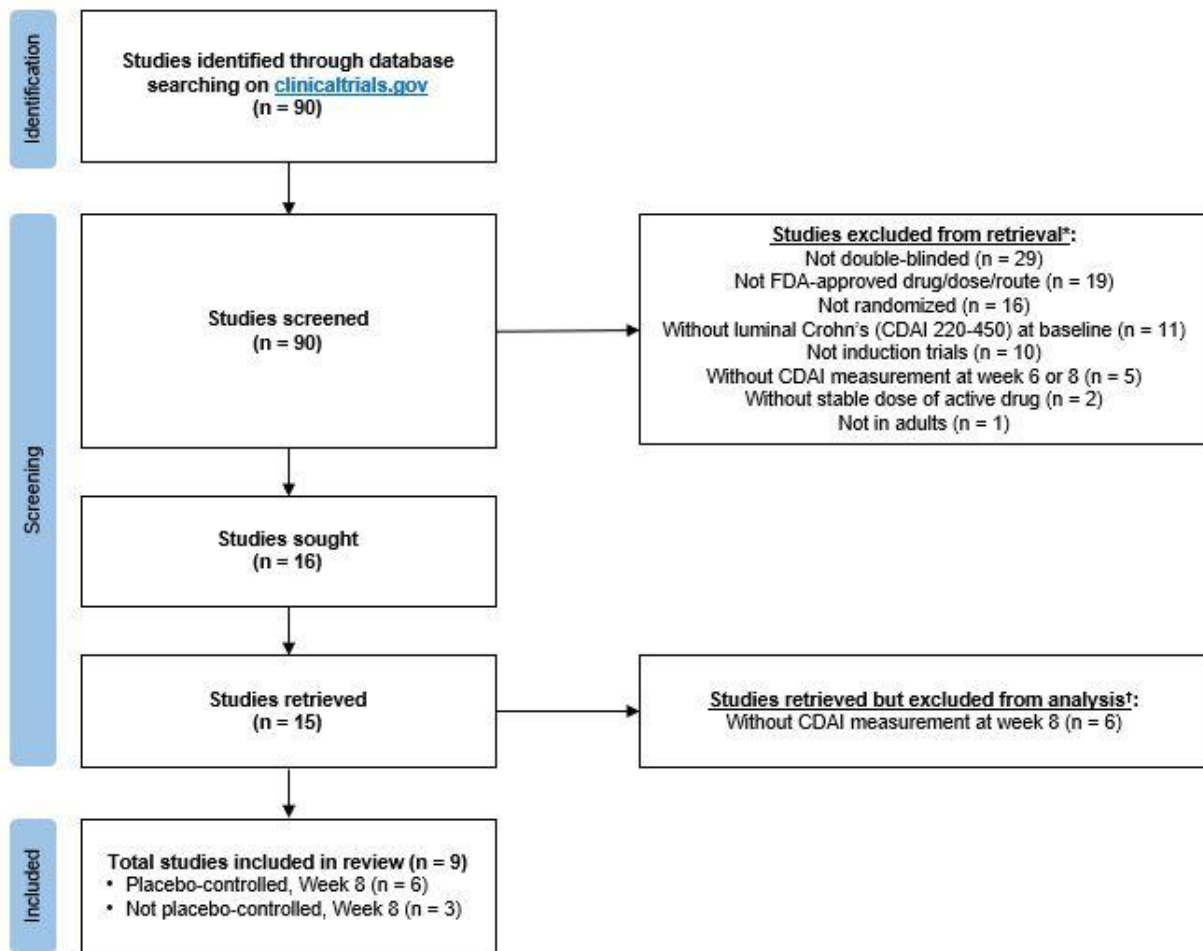

Flow diagram illustrating selection of studies.

\*Some studies met more than one criterion.

†All 15 studies were retrieved and consolidated on the Vivli platform; however, only 9 studies were used for analysis as these studies captured CDAI measurement at week 8 and could be compared with the SEAVUE study.

Supplementary Figure 2: Risk of bias

|                             |          | Randomization Process | Deviations from intended interventions | Missing outcome data | Measurement of the outcome | Selection of the reported result | Outcome |
|-----------------------------|----------|-----------------------|----------------------------------------|----------------------|----------------------------|----------------------------------|---------|
| <a href="#">NCT01369329</a> | UNIT11   | +                     | +                                      | +                    | +                          | +                                | +       |
| <a href="#">NCT01369342</a> | UNIT12   | +                     | +                                      | +                    | +                          | +                                | +       |
| <a href="#">NCT00771667</a> | CERTIFI  | +                     | +                                      | +                    | +                          | +                                | +       |
| <a href="#">NCT00783692</a> | GEMINI2  | +                     | +                                      | +                    | +                          | +                                | +       |
| <a href="#">NCT01224171</a> | GEMINI3  | +                     | +                                      | +                    | +                          | +                                | +       |
| <a href="#">NCT00032786</a> | ENACT    | +                     | +                                      | +                    | +                          | +                                | +       |
| <a href="#">NCT00078611</a> | ENCORE   | +                     | +                                      | +                    | +                          | +                                | +       |
| <a href="#">NCT00552058</a> |          | +                     | +                                      | +                    | +                          | +                                | +       |
| <a href="#">NCT00291668</a> |          | +                     | +                                      | +                    | +                          | +                                | +       |
| <a href="#">NCT00152490</a> | PRECISE1 | !                     | +                                      | +                    | !                          | +                                | +       |
| <a href="#">NCT00152425</a> | PRECISE2 | -                     | !                                      | +                    | +                          | +                                | -       |
| <a href="#">NCT00207662</a> | ACCENT   | -                     | !                                      | +                    | +                          | +                                | -       |
| <a href="#">NCT00094458</a> | SONIC    | +                     | +                                      | +                    | +                          | +                                | +       |
| <a href="#">NCT00348283</a> | EXTEND   | -                     | !                                      | +                    | +                          | +                                | +       |
| <a href="#">NCT00055523</a> | CLASSIC1 | +                     | +                                      | +                    | +                          | +                                | +       |
| <a href="#">NCT00055523</a> | CLASSIC2 | -                     | !                                      | +                    | !                          | !                                | -       |
| <a href="#">NCT02499783</a> |          | +                     | +                                      | +                    | +                          | +                                | +       |

Cochrane's risk-of-bias tool for randomized trials version 2 (ROB2). Green, yellow, and red indicate low, moderate, and high risk of bias respectively.

### Supplementary Figure 3: Reproducibility of published data

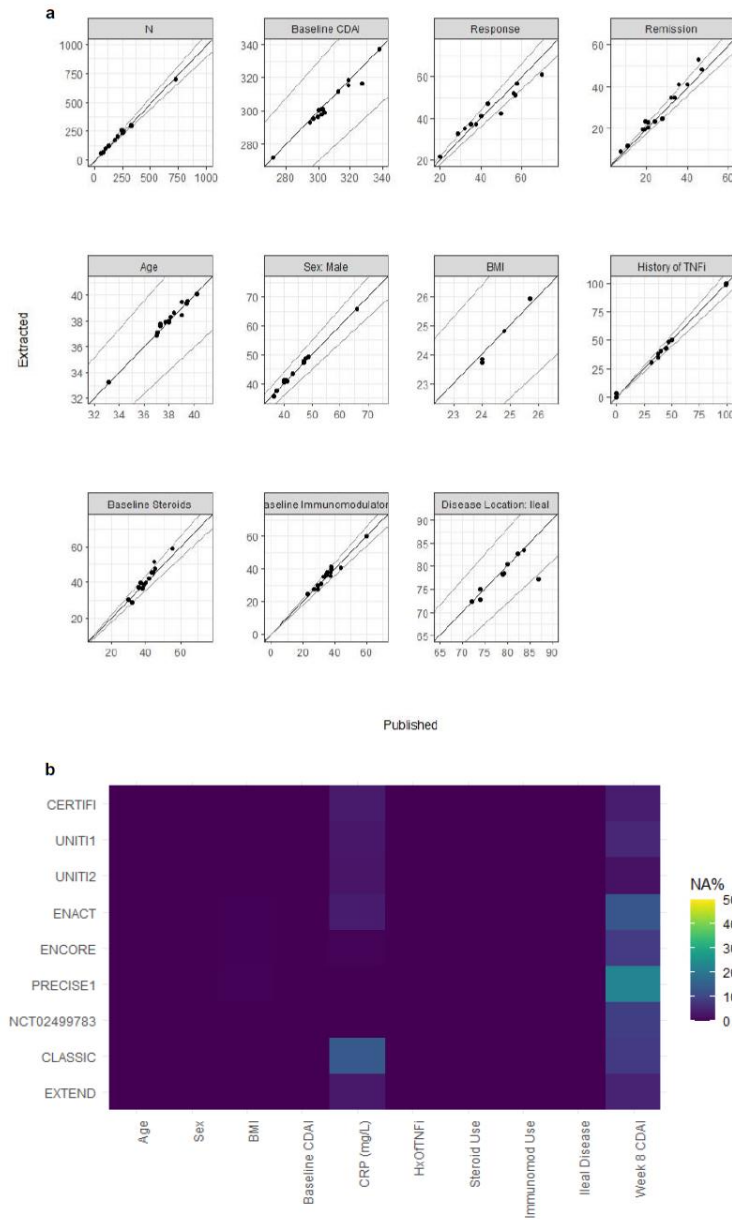

**a**, Plots of aggregated data versus published data for baseline covariates and outcome variables as a measure of quality control. Each dot represents the mean variable estimate for a given study treatment group (placebo, active). Data were not displayed if the study did not report the variable mean in its original article. Upper and lower lines in plots correspond to  $\pm 10\%$  error bounds. **b**, Percentage of missing covariates by study. Approximately 0.2% of BMI values, 2% of CRP values, and 11% of week 8 CDAI values were missing after data harmonization and required imputation. Median imputation by study was used to impute missing BMI and CRP values. Last observation carried forward (LOCF) was used to impute missing week 8 CDAI values; CDAI observations from week 6, week 4, week 3, or week 2 were candidates for LOCF.

### Supplementary Figure 4: Leave-one-trial-out analysis

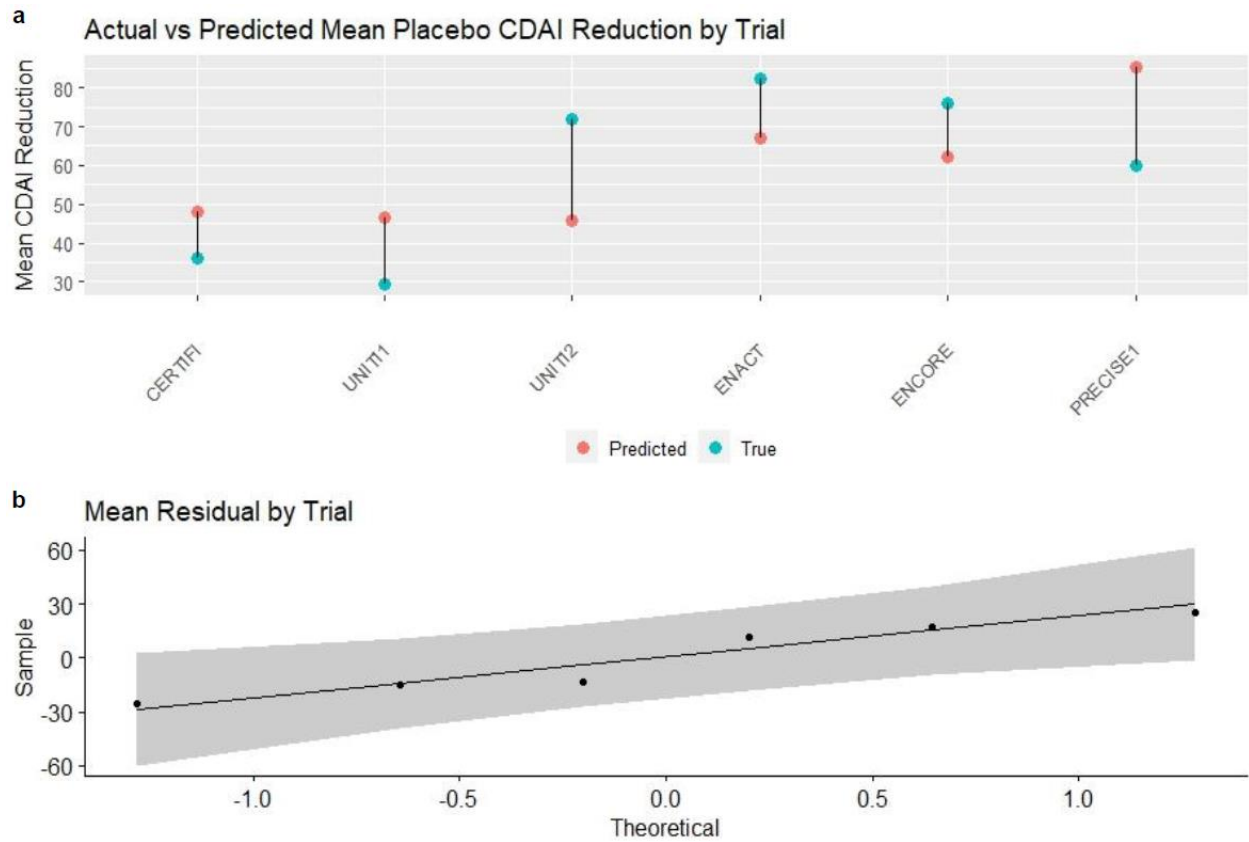

**a**, A leave-one-trial-out analysis, where blue and red dots represent the true and predicted mean CDAI reduction respectively. **b**, Q-Q plot of the model residuals (difference in true and predicted mean CDAI reduction values per study) to assess residual normality ( $p=0.4$  by the Shapiro-Wilk test).

### Supplementary Figure 5: Checking model assumptions

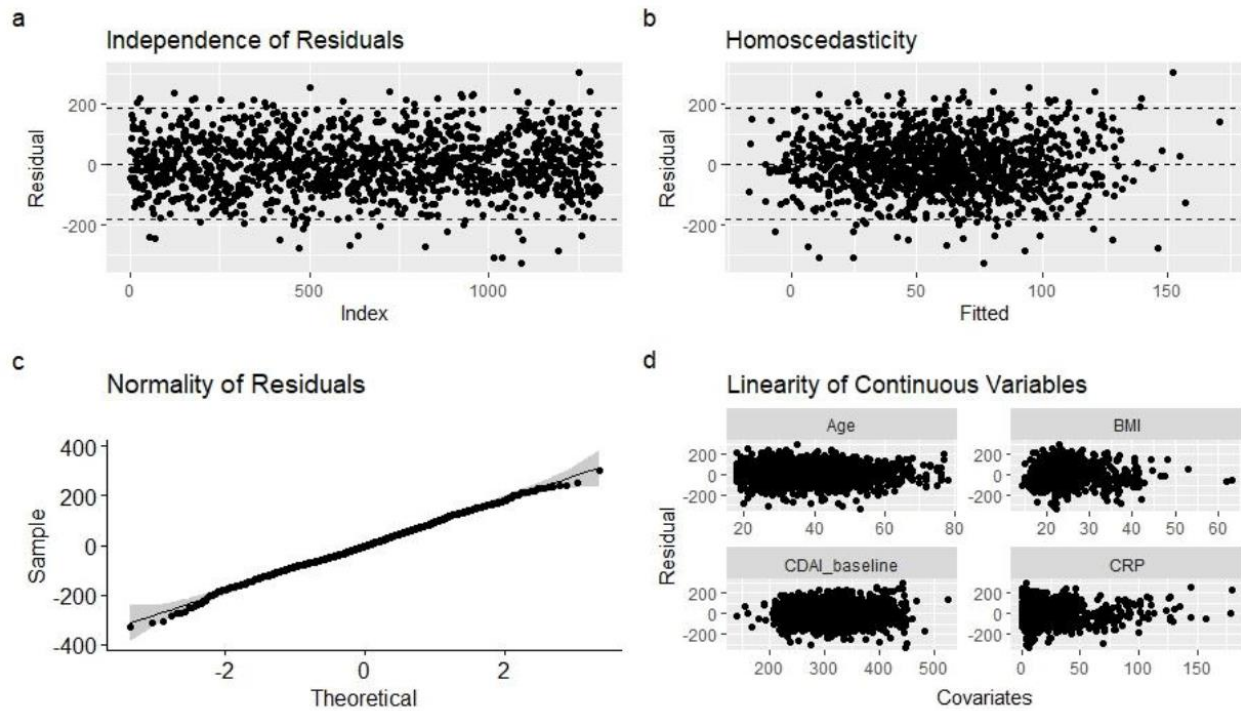

Plotting the placebo-attributable model residuals to visually check linear regression model assumptions. **a**, Plot of the model residuals versus index to assess residual independence. Dotted lines represent  $\pm 2\sigma$ . **b**, Plot of the model residuals versus the fitted values to assess residual homoscedasticity. **c**, Q-Q plot of the model residuals to assess residual normality. **d**, Plot of the model residuals versus each continuous covariate to assess linearity between covariates and the outcome variable.

**Supplementary Table 1: Major inclusion/exclusion criteria of included studies**

| Trial                       | Age ≥ 18 | Baseline CDAI 220-450 | Ileal and/or colonic involvement | Disease activity by biochemical/imaging/ endoscopy | TNFi intolerance/failure | TNFi naive* | Stable concomitant medications | No symptomatic stricture | No abscess | No recent surgery | No stoma or ostomy |
|-----------------------------|----------|-----------------------|----------------------------------|----------------------------------------------------|--------------------------|-------------|--------------------------------|--------------------------|------------|-------------------|--------------------|
| PRECISE1                    | ✓        | ✓                     | NA                               | NA                                                 | X                        | ✓           | ✓                              | ✓                        | ✓          | NA                | ✓                  |
| ENACT                       | ✓        | ✓                     | ✓                                | ✓                                                  | X                        | X           | ✓                              | ✓                        | ✓          | NA                | ✓                  |
| ENCORE                      | ✓        | ✓                     | NA                               | ✓                                                  | X                        | X           | ✓                              | ✓                        | ✓          | X                 | ✓                  |
| CERTIFI                     | ✓        | ✓                     | ✓                                | X                                                  | ✓                        | X           | ✓                              | ✓                        | ✓          | ✓                 | ✓                  |
| UNIT11                      | ✓        | ✓                     | ✓                                | X                                                  | ✓                        | X           | ✓                              | ✓                        | ✓          | ✓                 | ✓                  |
| UNIT12                      | ✓        | ✓                     | ✓                                | ✓                                                  | X                        | ✓           | ✓                              | ✓                        | ✓          | ✓                 | ✓                  |
| CLASSIC                     | ✓        | ✓                     | NA                               | NA                                                 | X                        | ✓           | ✓                              | ✓                        | NA         | ✓                 | ✓                  |
| EXTEND                      | ✓        | ✓                     | ✓                                | ✓                                                  | X                        | X           | ✓                              | NA                       | NA         | NA                | NA                 |
| <a href="#">NCT02499783</a> | ✓        | ✓                     | X                                | ✓                                                  | X                        | ✓           | ✓                              | ✓                        | X          | ✓                 | ✓                  |

If the trial protocol was not publicly available, and if the corresponding manuscript or clinical study report was silent on a given criteria, the field was annotated as NA. If the trial protocol was available and if it was clear that a given criterion was not applied for cohort selection, the field was annotated with an X. In many trials (e.g., ENACT, ENCORE), a history of TNF-naive or intolerance/failure was not a requirement and was captured as a participant-specific covariate for regression-based control. In other scenarios, the trial-specific covariate implicitly applied to all trial participants (e.g., TNF-naive status in PRECISE1). Trials were generally consistent on the target patients of study in terms of inclusion and exclusion criteria. To address the possibility of residual heterogeneity due to the lack of perfectly consistent eligibility criteria or unmeasured covariates, a trial-specific random effect was included in the final regression models.

\*Either absence of exposure or absence of prior intolerance or inadequate response.

**Supplementary Table 2: Model selection**

| Prediction Model          | Package      | Mean 5-Fold CV RMSE |
|---------------------------|--------------|---------------------|
| Linear Regression         | lm           | 93.19               |
| Linear Mixed Effect Model | lme4         | 93.19               |
| Linear LASSO Regression   | glmnet       | 93.14               |
| Random Forest             | randomForest | 92.85               |
| XGBoost (DART)            | xgboost      | 96.20               |
| Stacked Ensemble          | MLJAR        | 90.81               |

Mean 5-fold cross-validation (CV) root mean squared error (RMSE) scores of various predictive models. All models were tested against the same stratified 5-fold datasets to ensure results were comparable. RMSE scores reflect the model's ability to predict CDAI reduction at week 8 due to a placebo treatment given baseline covariates (age, sex, BMI, etc.). The stacked ensemble model was built from 9 default base models using the mljar AutoML package.
